# Supplementary material for: A retinoraphe projection regulates serotonergic activity and looming-evoked defensive behaviour
Source: PubMed Central journal article supplement (PMC5381010; doi:10.1038/ncomms14908), 2017-03-31
Supplement: ncomms14908-s1.pdf [file ncomms14908-s1.pdf]

1  
2  
3  
4

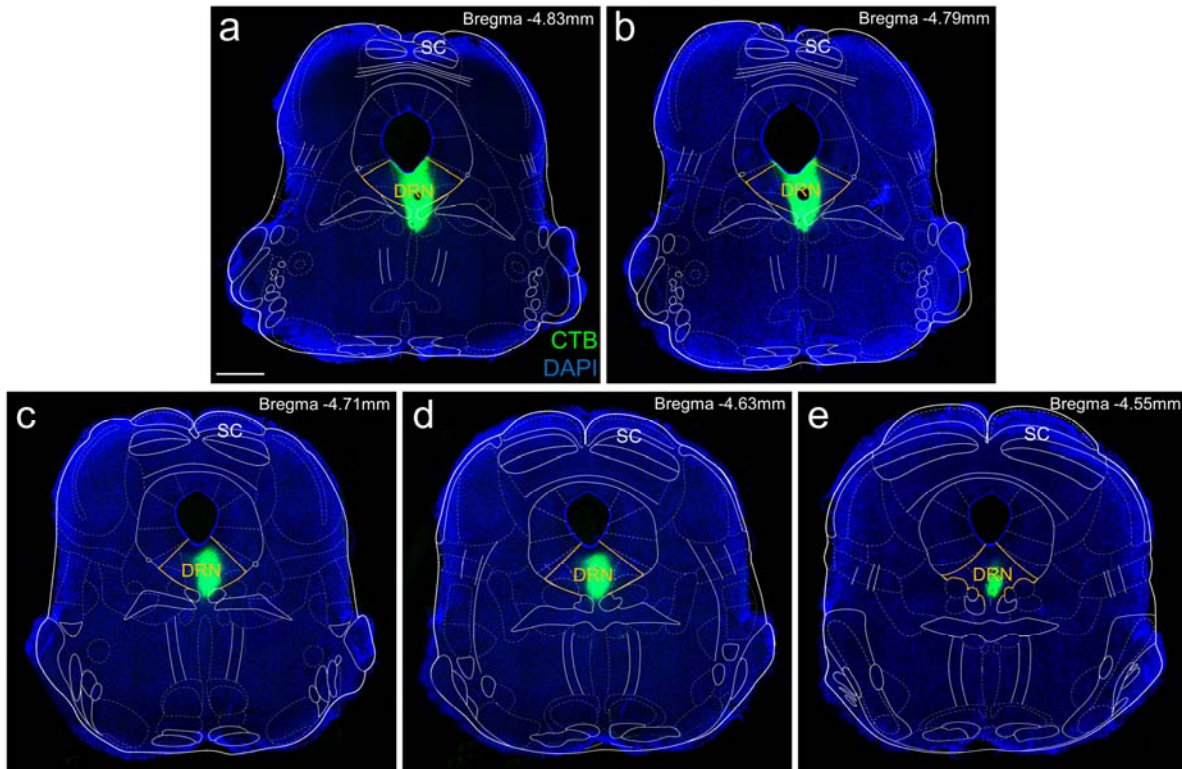

5  
6  
7  
8  
9  
10  
11  
12  
13  
14  
15  
16  
17  
18  
19  
20  
21  
22  
23  
24  
25  
26  
27  
28

**Supplementary Figure 1** CTB-488 DRN injection site which avoided the SC. (a-e) A representative example of CTB-488 deposited into the DRN of a C57BL/6 mouse illustrated in a series of 40  $\mu$ m sections from caudal to rostral. Note SC is unlabeled. Scale bar: (a) 1 mm.

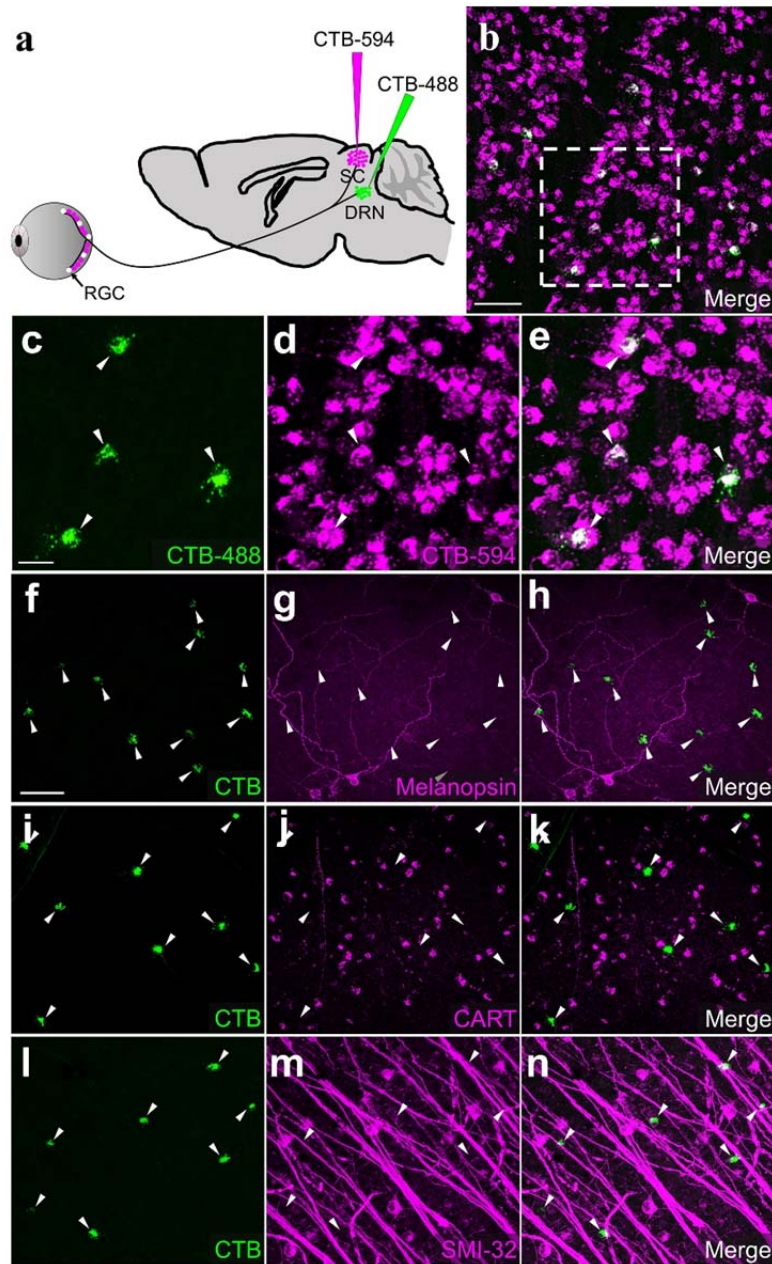

29  
 30 **Supplementary Figure 2** DRN-projecting RGCs innervate the DRN and SC via branching  
 31 axons and these neurons are immunonegative for melanopsin, CART, and SMI-32. (a) Injection  
 32 paradigm used to label RGCs with branching axons innervating the DRN and SC. (b) A merged  
 33 image of a retinal whole mount illustrating double-labeled RGCs that innervate the DRN and SC.  
 34 (c-e) Region defined in (b) viewed under higher magnification illustrating CTB-488 labeled  
 35 DRN-projecting RGCs (arrow heads) (c) and CTB-594 labeled SC-projecting RGCs (d), and  
 36 merged image (e). (f-n) Retinal whole mounts containing CTB-labeled DRN-projecting RGCs  
 37 that were subjected to immunostaining for melanopsin, CART, and SMI-32 and no doubled-  
 38 labeled RGCs were observed. Scale bars: (b and f) 50  $\mu$ m; (c) 20  $\mu$ m.

39  
 40

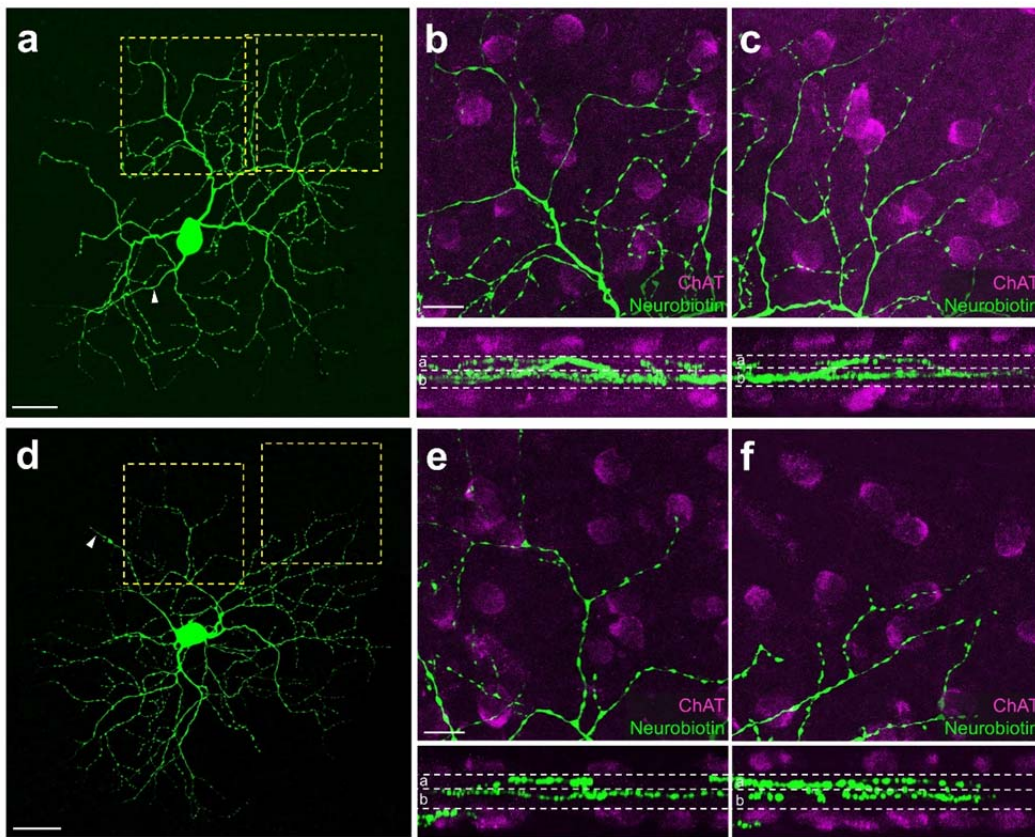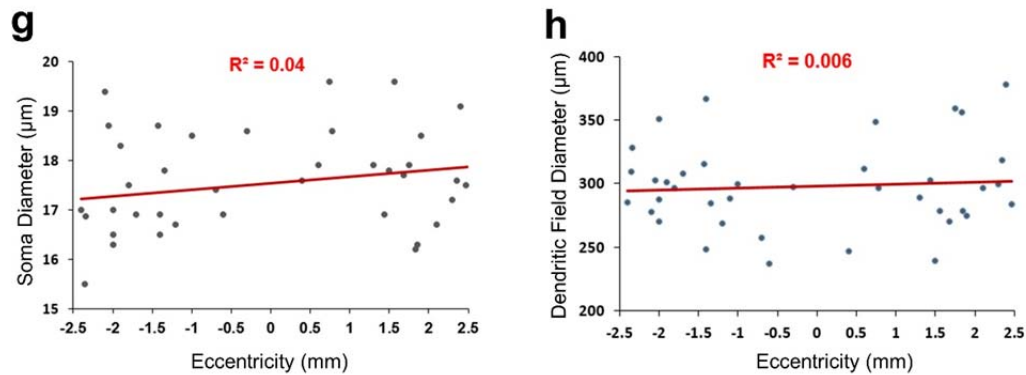

41  
 42 **Supplementary Figure 3** Dendritic morphology of DRN-projecting RGCs. (a-f) Two DRN-  
 43 projecting RGCs filled with neurobiotin. Note that they both have an asymmetric dendritic field,  
 44 and bistratified dendritic arbors. (g,h) Plot of soma diameter (g) and dendritic field diameter (h)  
 45 as a function of retinal eccentricity. 3 animals were used in each analysis. Scale bars: (a and d)  
 46 20  $\mu\text{m}$ ; (b and e) 10  $\mu\text{m}$ .

47  
 48  
 49  
 50  
 51  
 52  
 53



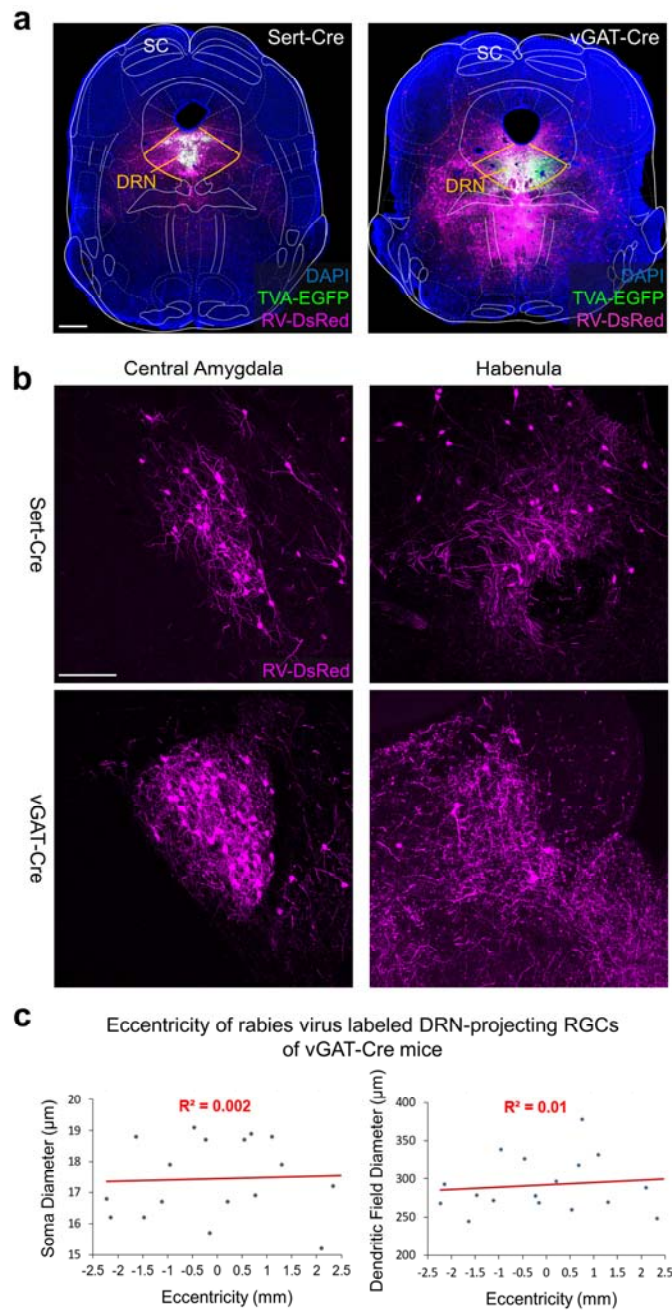

54  
 55 **Supplementary Figure 4** Rabies virus labeled monosynaptic inputs from central amygdala and  
 56 habenula to DRN 5-HT and GABA neurons. **(a)** Coronal sections of a Sert-Cre (left) and a  
 57 vGAT-Cre (right) brain showing injection sites of rabies-based transsynaptic system. Note that  
 58 the location of the starter cells (white) is confined to the DRN. **(b)** Coronal sections through the  
 59 central amygdala and habenula from a Sert-Cre mouse and a vGAT-Cre mouse showing the  
 60 distribution of presynaptic neurons (magenta). **(c)** Plot of soma diameter and dendritic field  
 61 diameter as a function of retinal eccentricity of rabies-labeled DRN-projecting RGCs. Scale bars:  
 62 **(a)** 500  $\mu\text{m}$ ; **(b)** 100  $\mu\text{m}$ .

63  
 64  
 65  
 66

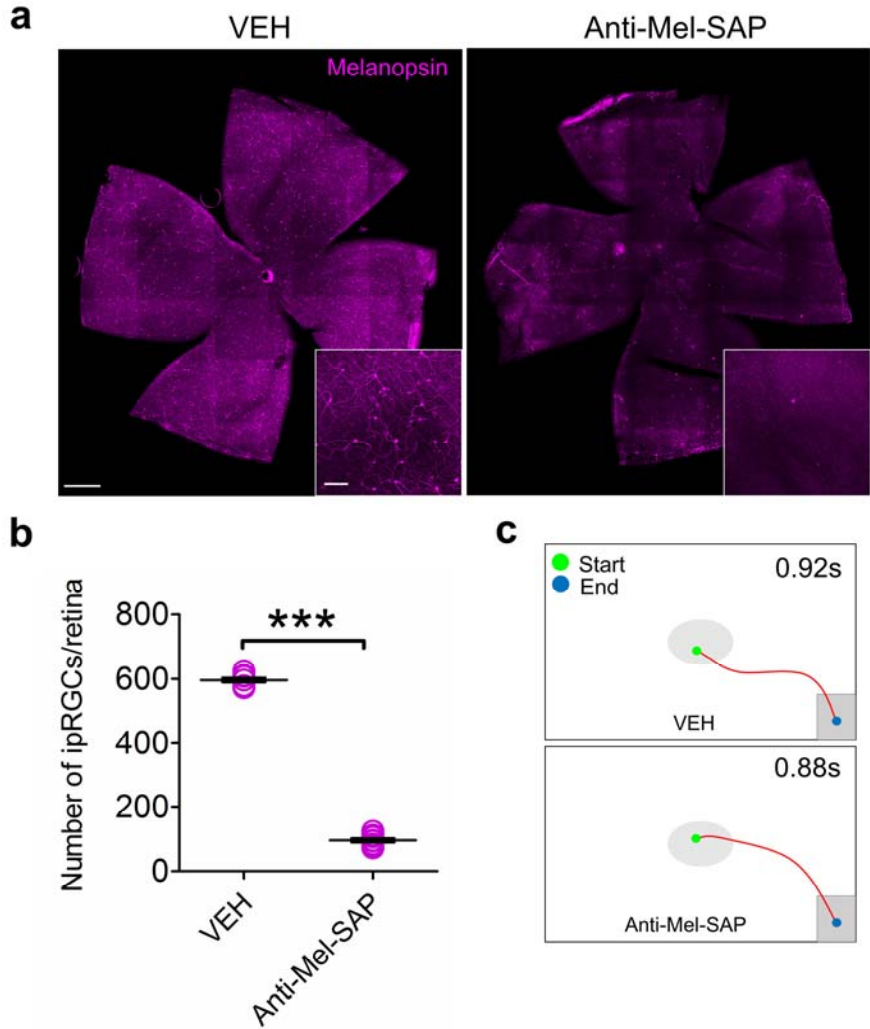

67  
68  
69  
70  
71  
72  
73  
74  
75  
76  
77  
78  
79  
80  
81  
82  
83  
84  
85  
86

**Supplementary Figure 5** Selective immunotoxin ablation of melanopsin-expressing RGCs does not influence looming induced defensive response. **(a)** Retinal whole mounts illustrating melanopsin-expressing RGCs in animals receiving intraocular injections of saline (VEH) or anti-melanopsin-saporin immunotoxin (Anti-Mel-SAP). **(b)** Quantification showing Anti-Mel-SAP reduction of melanopsin-expressing RGCs. One-way ANOVA; \*\*\*  $p < 0.0001$ . **(c)** Representative traces of animal movement during looming stimulation (10.75 s) in VEH and Anti-Mel-SAP groups. Scale bars: **(a)**-left 500  $\mu\text{m}$ ; **(a)**-inset 100  $\mu\text{m}$ . Data represented as mean  $\pm$  s.e.m.

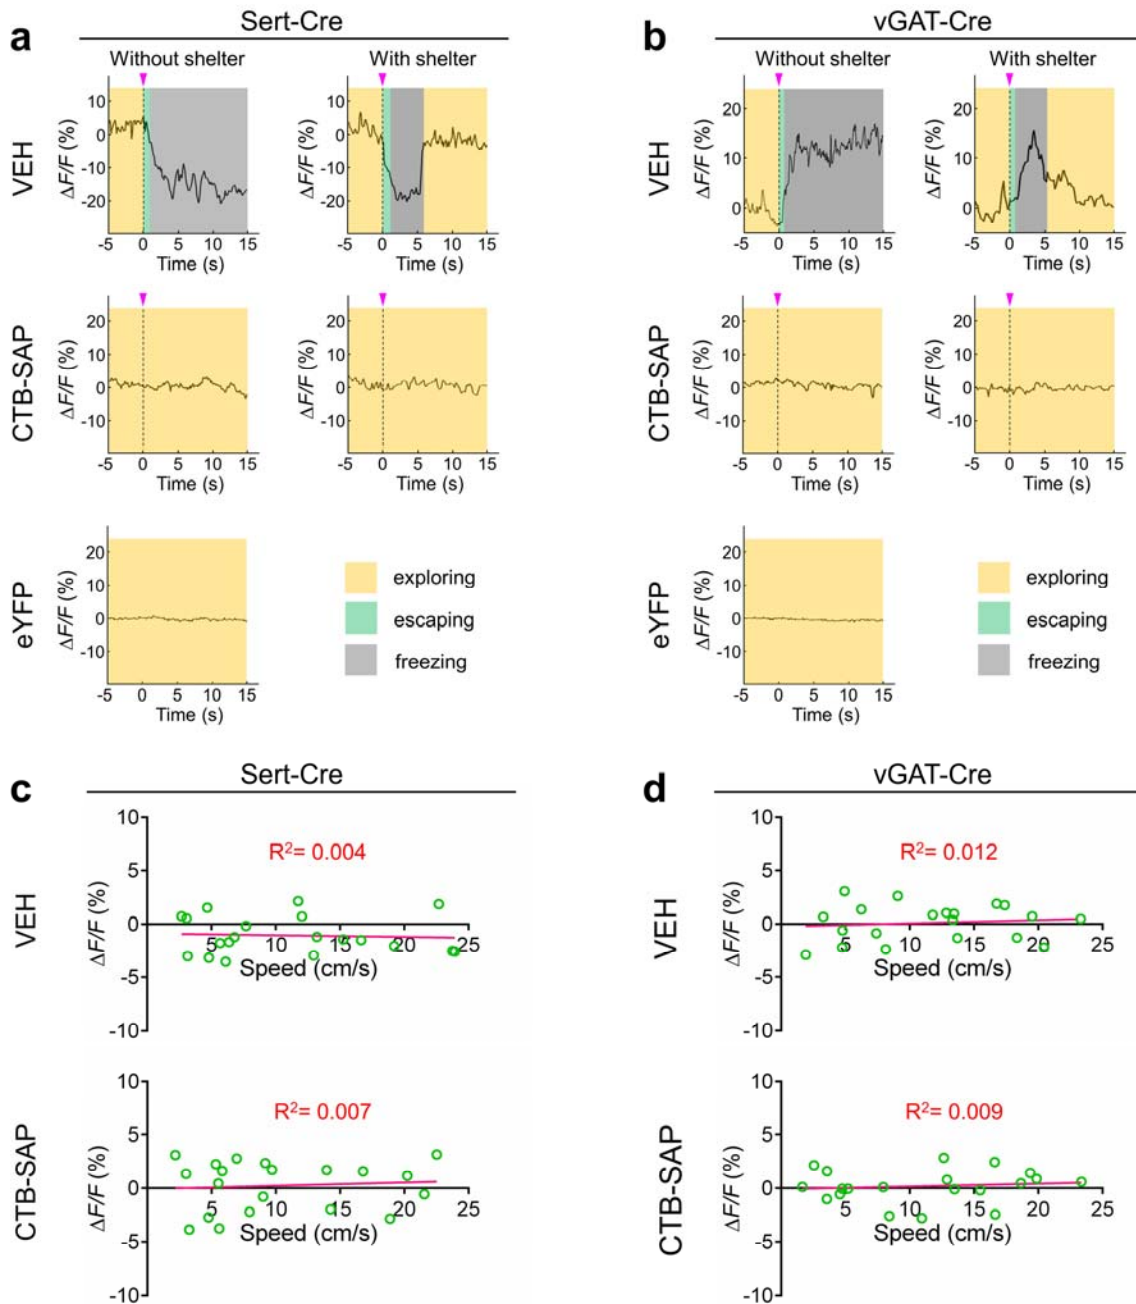

87  
 88 **Supplementary Figure 6** Relationship between behavior and GCaMP fluorescence changes  
 89 during looming stimulation. **(a,b)** VEH: Representative raw traces of GCaMP fluorescence  
 90 changes in response to looming stimulation in VEH-treated Sert-Cre/vGAT-Cre mice; CTB-SAP:  
 91 Representative raw traces of GCaMP fluorescence changes in response to looming stimulation in  
 92 anti-CTB-SAP treated Sert-Cre/vGAT-Cre mice. eYFP: measurement of potential movement  
 93 artifact from DRN 5-HT or GABA neurons expressing eYFP. **(c)** Correlation between speed and  
 94 GCaMP fluorescence changes in VEH or anti-CTB-SAP treated Sert-Cre mice. **(d)** Correlation  
 95 between speed and GCaMP fluorescence changes in VEH or anti-CTB-SAP treated vGAT-Cre  
 96 mice.  
 97

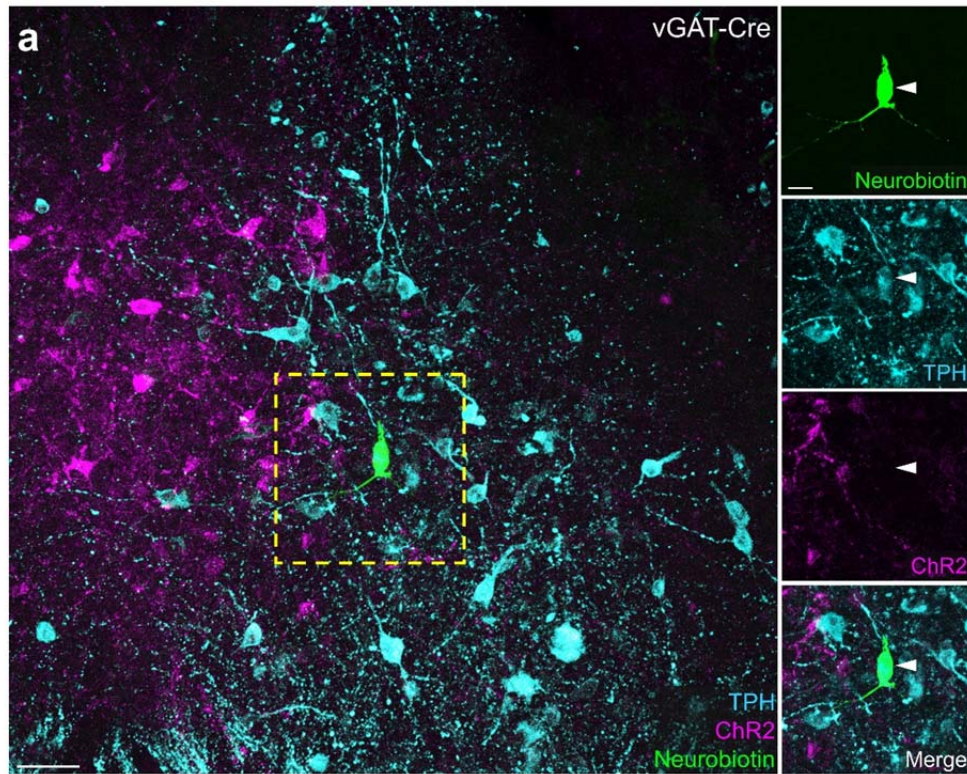

**b**

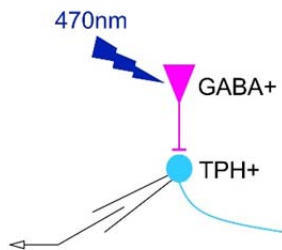

**c**

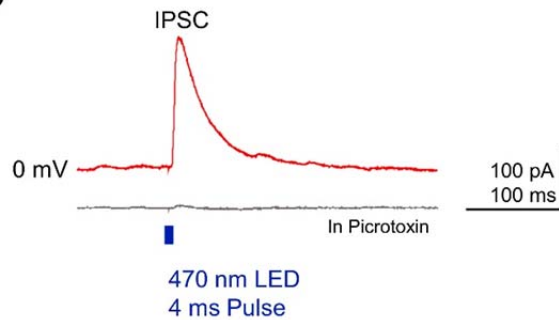

98

99

100 **Supplementary Figure 7** Optogenetic activation of DRN GABA neurons *in vitro* inhibits DRN  
 101 5-HT neurons. **(a)** Merged image illustrating a neurobiotin-filled 5-HT neuron in a DRN slice  
 102 from a vGAT-Cre mouse in which GABA neurons were transfected with AAV-DIO-ChR2-  
 103 mCherry. **(b)** Before neurobiotin filling of the 5-HT neuron illustrated in **(a)** it was recorded  
 104 using the whole-cell patch-clamp technique while the slice was stimulated with blue (470 nm)  
 105 light. **(c)** The recorded 5-HT neuron was inhibited by optogenetic activation of DRN GABA  
 106 neurons via a GABA<sub>A</sub> receptor-mediated mechanism as the evoked-IPSC was blocked by bath  
 application of 100 μM picrotoxin. Scale bars: **(a)**-left 50 μm; **(a)**-right 20 μm.

107

108

109

110

111

112

113



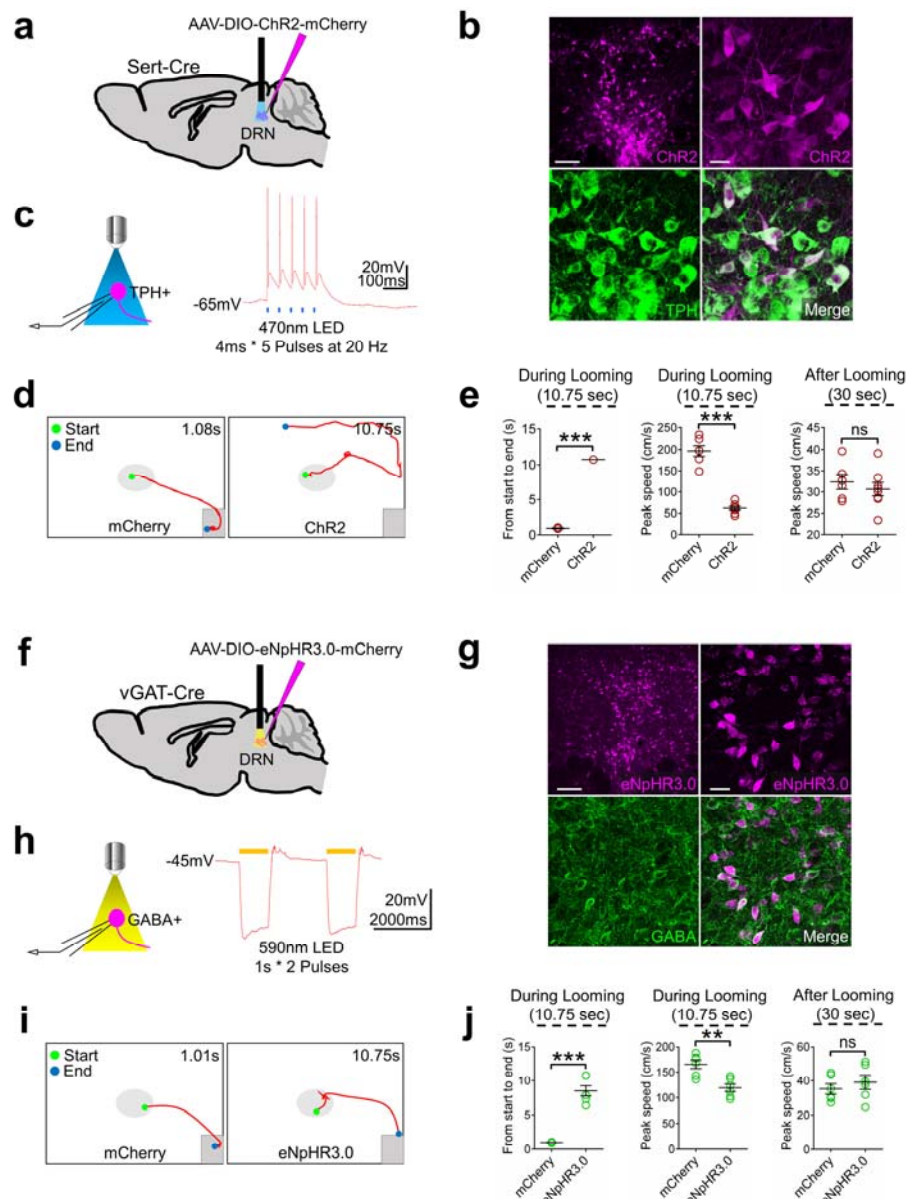

114 **Supplementary Figure 8** Optogenetic activation of DRN 5-HT neurons inhibits looming-  
 115 evoked response. (a) AAV-DIO-ChR2-mCherry was injected into DRN of Sert-Cre mice. (b)  
 116 Images of TPH cells in DRN of a Sert-Cre mouse two weeks after ChR2 transfection. (c)  
 117 Representative example of optogenetic (470nm blue light) activation of a DRN 5-HT neuron in  
 118 an in vitro slice preparation. (d) Representative traces of animal movement when DRN 5-HT  
 119 neurons were optogenetically activated during looming stimulation (10.75 sec). Time in corner is  
 120 duration from start to end. (e) Duration from start to end points, peak speed during and after  
 121 looming stimulation in mCherry and ChR2 treated animals. One-way ANOVA; \*\*\*  $p < 0.0001$ ; ns  
 122 = no significant difference. (f) AAV-DIO-eNpHR3.0-mCherry was injected into DRN of vGAT-  
 123 Cre mice. (g) Images of GABA cells in DRN of a vGAT-Cre mouse two weeks after eNpHR3.0  
 124 transfection. (h) Representative example of optogenetic (590nm yellow light) inhibition of a  
 125 DRN GABA neuron in an in vitro slice preparation. (i) Representative traces of animal  
 126 movement when DRN GABA neurons were optogenetically inhibited during looming  
 127 stimulation (10.75 sec). Time in corner is duration from start to end. (j) Duration from start to  
 128 end points, peak speed during and after looming stimulation in mCherry and eNpHR3.0 treated  
 129 animals. One-way ANOVA; \*\*\*  $p < 0.0001$ ; \*\*  $p < 0.001$ ; ns = no significant difference. Scale  
 130 bars: (b and g)-left 100  $\mu\text{m}$ ; (b and g)-right 20  $\mu\text{m}$ . Data represented as mean  $\pm$  s.e.m.
